# Supplementary material for: Identification of Monobenzone as a Novel Potential Anti-Acute Myeloid Leukaemia Agent That Inhibits RNR and Suppresses Tumour Growth in Mouse Xenograft Model
Source: MDPI journal article supplement (doi:10.3390/cancers14194710), 2022-09-27
Supplement: s1 [file s1]

Archive with 1 entries (1 files):
- cancers-1883718-supplementary.pdf
