# Supplementary material for: Identification of Monobenzone as a Novel Potential Anti-Acute Myeloid Leukaemia Agent That Inhibits RNR and Suppresses Tumour Growth in Mouse Xenograft Model
Source: MDPI journal article supplement (doi:10.3390/cancers14194710), 2022-09-27
Supplement: s1 [file s1 › cancers-1883718-supplementary.pdf]

# Identification of Monobenzene as a Novel Potential Anti-Acute Myeloid Leukaemia Agent That Inhibits RNR and Suppresses Tumour Growth in Mouse Xenograft Model

Jingwen Dong, Tingting Zhong, Zhijian Xu, Haiyi Chen, Xianjun Wang, Lili Yang, Zhiyuan Lou, Yuanling Xu, Tingjun Hou, Rongzhen Xu, Weiliang Zhu and Jimin Shao

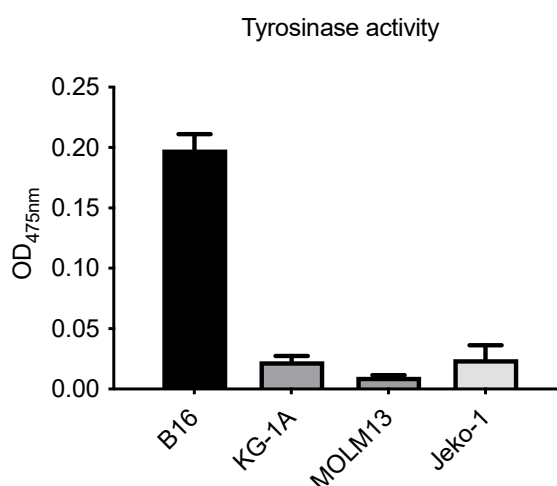

**Figure S1.** Tyrosinase activity assays. After the indicated cells were treated with L-dopa, the absorbance was measured at 475 nm.

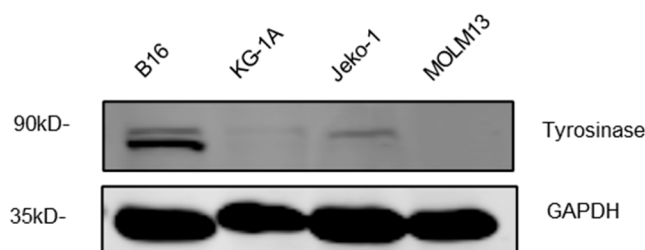

**Figure S2.** Western blot showing tyrosinase protein levels in the indicated cells. Relative protein level of tyrosinase and GAPDH were shown.

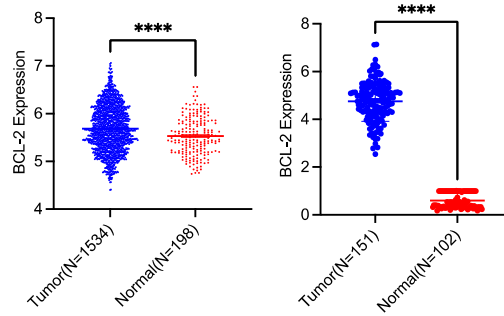

**Figure S3.** BCL-2 expression in samples from normal persons (N = 198) and patients with AML (N = 1534) in the GSE147515 dataset. BCL-2 expression in samples from normal persons (bone marrow samples) (N = 102) in the GTEx dataset and patients with AML (N = 151) in TCGA dataset. Error bars represent SD. \* $p < 0.05$  represents the difference between the tumor group and the normal group.

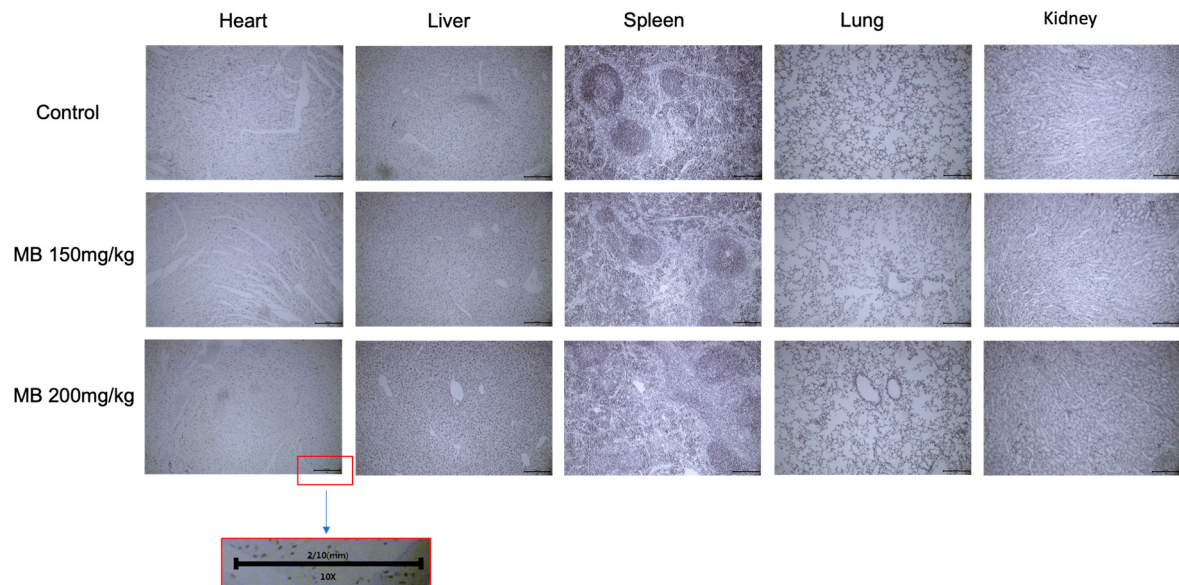

**Figure S4.** HE staining of mouse hearts, livers, spleens, lungs and kidneys from different groups.

Figure 3G

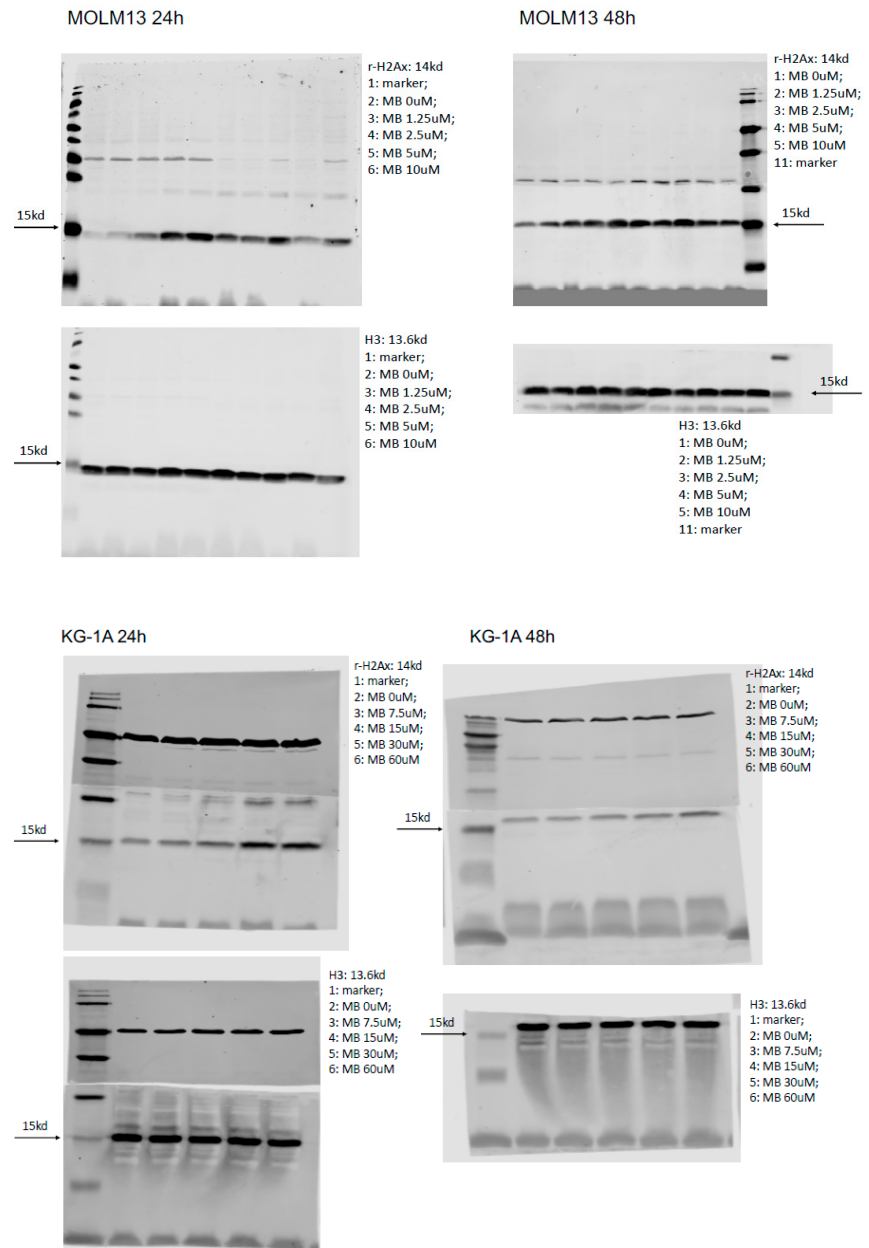

Figure S5. Original blots of Figure 3G.

Table S1. Western blotting gray value analysis of Figure 3G.

|        | MOLM13 24h |           |          |         |         | MOLM13 48h |           |          |         |         |
|--------|------------|-----------|----------|---------|---------|------------|-----------|----------|---------|---------|
|        | Control    | MB 1.25uM | MB 2.5uM | MB 5uM  | MB 10uM | Control    | MB 1.25uM | MB 2.5uM | MB 5uM  | MB 10uM |
| r-H2Ax | 162        | 1278      | 5759     | 15810   | 17793   | 6524       | 10705     | 12051    | 13491   | 17165   |
| H3     | 15923      | 25954     | 18960    | 24630   | 14956   | 22528      | 10616     | 15083    | 14503   | 9810    |
|        | KG-1A 24h  |           |          |         |         | KG-1A 48h  |           |          |         |         |
|        | Control    | MB 7.5uM  | MB 15uM  | MB 30uM | MB 60uM | Control    | MB 7.5uM  | MB 15uM  | MB 30uM | MB 60uM |
| r-H2Ax | 9667       | 13158     | 16135    | 17619   | 25023   | 10137      | 11756     | 13949    | 25840   | 19350   |
| H3     | 24258      | 21458     | 24016    | 24208   | 28439   | 15289      | 22103     | 20835    | 23657   | 24404   |

Figure 3K

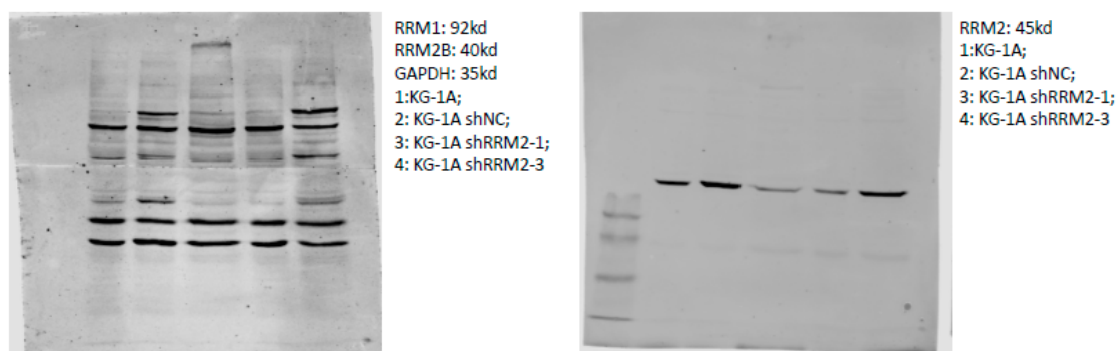

Figure S6. Original blots of Figure 3K.

Table S2. Western blotting gray value analysis of Figure 3K.

|       | KG-1A | KG-1A shNC | KG-1A shRRM2-1 | KG-1A shRRM2-3 |
|-------|-------|------------|----------------|----------------|
| RRM1  | 54901 | 67140      | 90352          | 65045          |
| RRM2  | 38980 | 59762      | 21152          | 15359          |
| RRM2B | 55696 | 45854      | 64969          | 43021          |
| GAPDH | 61835 | 77188      | 78652          | 73806          |

Figure S2

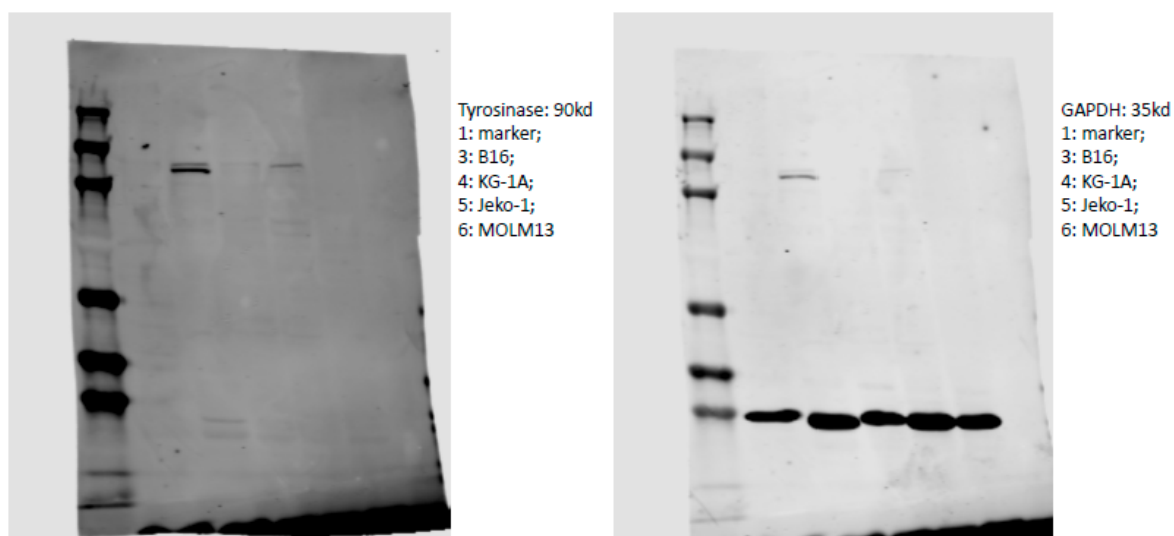

Figure S7. Original blots of Figure S2.

Table S3. Western blotting gray value analysis of figure S2.

|            | B16   | KG-1A | Jeko-1 | MOLM13 |
|------------|-------|-------|--------|--------|
| Tyrosinase | 50548 | 4656  | 12977  | 2112   |
| GAPDH      | 54993 | 28993 | 42095  | 41541  |
